# Supplementary material for: A Human Platelet Receptor Protein Microarray Identifies the High Affinity Immunoglobulin E Receptor Subunit α (FcεR1α) as an Activating Platelet Endothelium Aggregation Receptor 1 (PEAR1) Ligand
Source: PubMed Central journal article supplement (PMC4424398; doi:10.1074/mcp.m114.046946), 2015-02-23
Supplement: supp_M114.046946_mcp.M114.046946-1.pdf [file supp_M114.046946_mcp.M114.046946-1.pdf]

## **Supplemental Information:**

### **A human platelet receptor protein microarray identifies FcεR1α as an activating PEAR1 ligand**

Yi Sun<sup>1</sup>, Christophe Vandenbriele<sup>2</sup>, Alexandre Kauskot<sup>2</sup>, Peter Verhamme<sup>2</sup>, Marc F. Hoylaerts<sup>2</sup> and Gavin J. Wright<sup>1</sup>.

<sup>1</sup>Cell Surface Signalling Laboratory, Wellcome Trust Sanger Institute, Cambridge, CB10 1SA, United Kingdom.

<sup>2</sup>Center for Molecular and Vascular Biology, Department of Cardiovascular Sciences, University of Leuven, Leuven, Belgium.

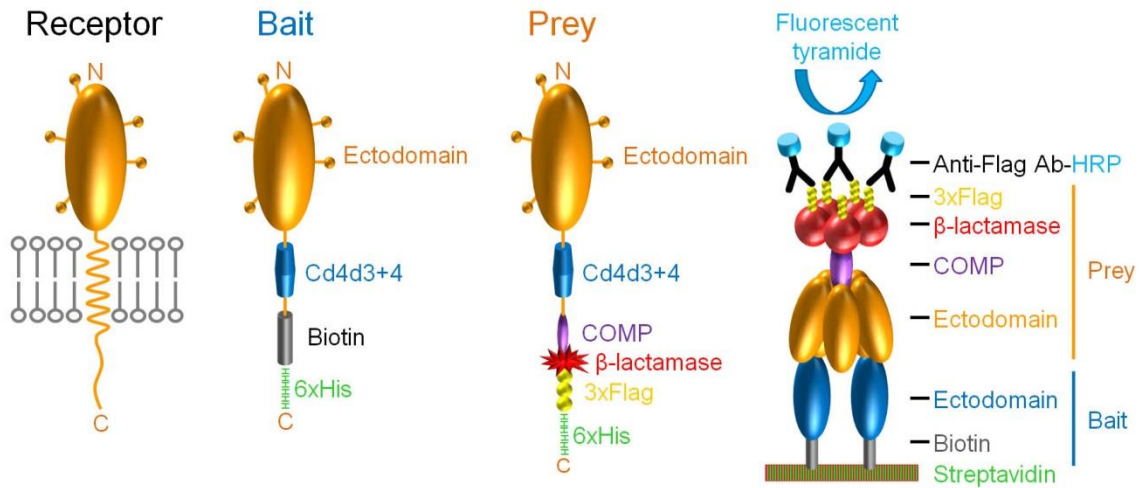

**Supplemental Figure S1. Schematics showing design of bait and prey constructs and the AVEXIS interaction assay.** A typical type I cell surface receptor is shown embedded within a membrane with the entire ectodomain shown as an orange oval, and filled lollipops representing potential N-linked glycosylation sites. The design of both monomeric biotinylated “bait” and pentameric β-lactamase-tagged “prey” containing the entire ectodomain of the receptor are shown (prey is shown as a monomer for clarity); both contain the rat Cd4 domain 3 and 4 (Cd4d3+4) and 6 His tags. The AVEXIS assay is shown with a biotinylated bait captured on streptavidin-coated slide interacting with a pentameric FLAG-tagged prey and interactions detected with an anti-FLAG HRP-conjugated secondary antibody and fluorescent tyramide HRP-substrate deposition.

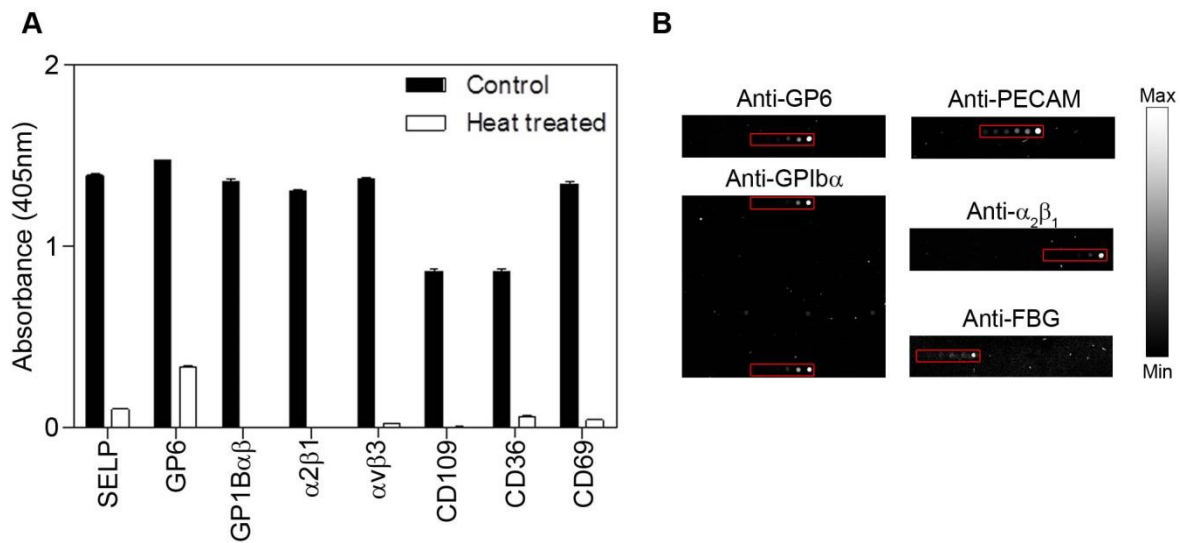

**Supplemental Figure S2. Proteins in the human platelet receptor library are antigenically active.** (A) The biochemical activity of selected recombinant proteins representing each structural class was confirmed by demonstrating heat-labile immunoreactivity of monoclonal antibodies which are known to stain the native protein on the platelet surface. The heat-treated and control proteins were probed with monoclonal antibodies (SELP: Thromb6; GP6: HY101; GP1B $\alpha\beta$ : PAB-5;  $\alpha 2\beta 1$ : P1E6;  $\alpha v\beta 3$ : BV3; CD109: B-E47; CD36: CB38; CD69: FN50) and detected by ELISA. Bars represent mean  $\pm$  SEM;  $n \geq 3$ . (B) Immunoreactivity to mAbs recognizing the individual named platelet receptors that are known to bind native proteins on platelets is preserved when arrayed on streptavidin-coated glass slides; note that anti-GPIb $\alpha$  identifies both the GPIb $\alpha$  monomer (bait 75) and GPIb $\alpha\beta$  complex (bait 77).

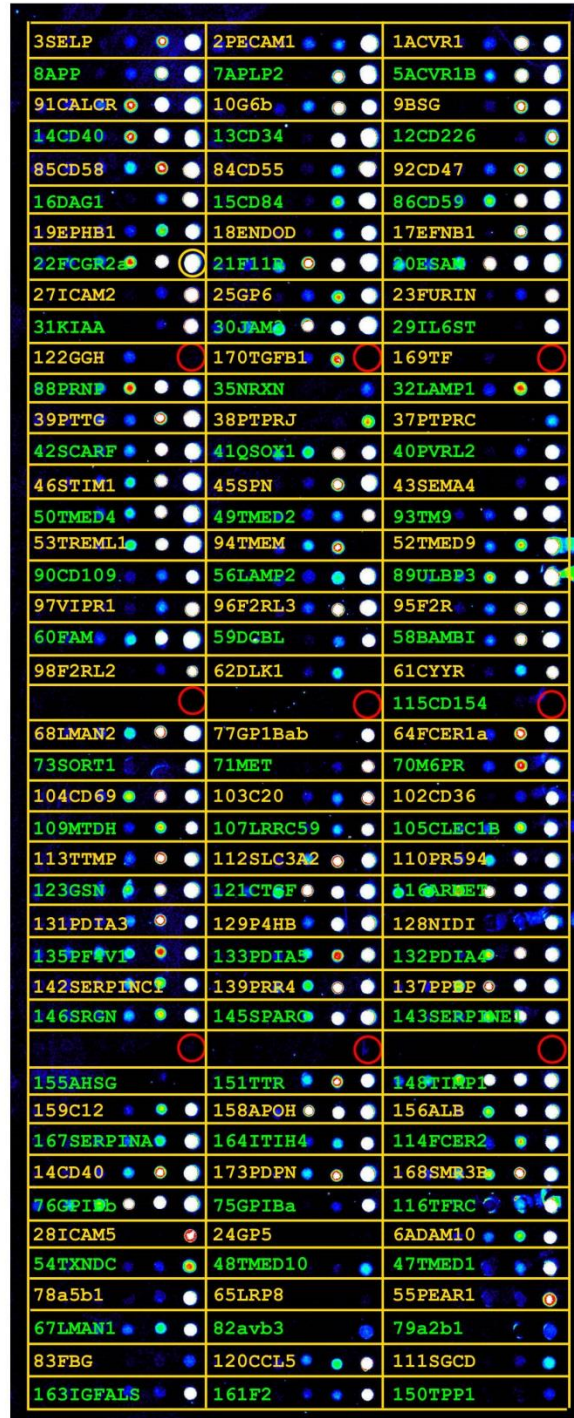

**Supplemental Figure S3. Map of the human platelet receptor protein microarray.** The image shows the platelet receptor microarray containing biotinylated ectodomains of human platelets receptor “baits” immobilized on a streptavidin-coated slide. The array was stained with a mouse anti-rat Cd4 mAb common to all baits, followed by an anti-mouse Cy3-conjugated secondary. The area containing the dilutions of each bait is boxed and numbered/described according to Supplemental Table 2. The highest dilution of the bait containing the IgG Fc receptor, FCGR2a (bait 22), which interacts directly with the HRP-conjugated anti-FLAG secondary antibody in the AVEIXIS protocol, is circled in yellow. The positions of nine spots of biotinylated HRP that are arrayed as orientation markers, which are not stained in this experiment, are indicated with red circles.

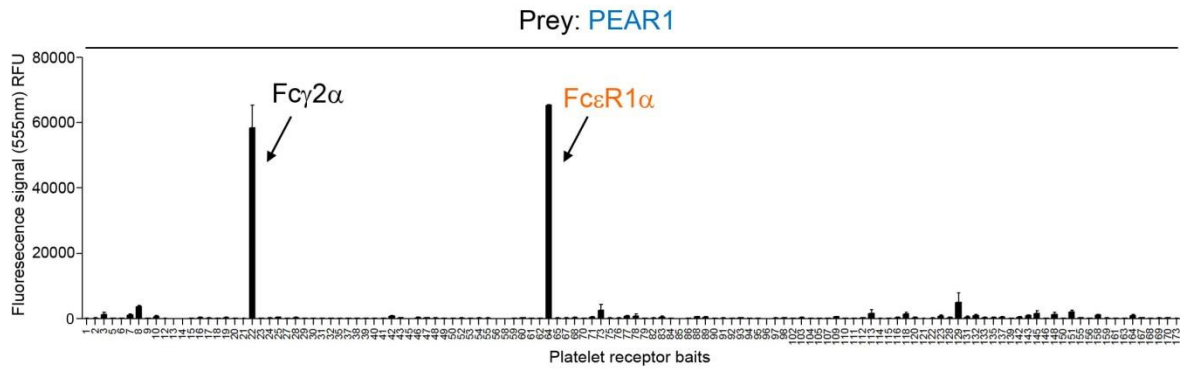

**Supplemental Figure S4. Systematic screening of a human platelet receptor protein microarray identified FcεR1α as a ligand for PEAR1: quantification of fluorescence signals.** Quantification of the fluorescence at 555 nm associated with each bait on a human platelet receptor protein microarray probed with FLAG-tagged PEAR1 prey protein identifying FcεR1α (bait 64) as a ligand for PEAR1. The IgG receptor, Fcγ2α (bait 22) directly interacted with the HRP-conjugated secondary antibody. Baits are numbered as described in Supplementary Table 2; bars represent mean fluorescence signals ± SEM;  $n = 3$ .

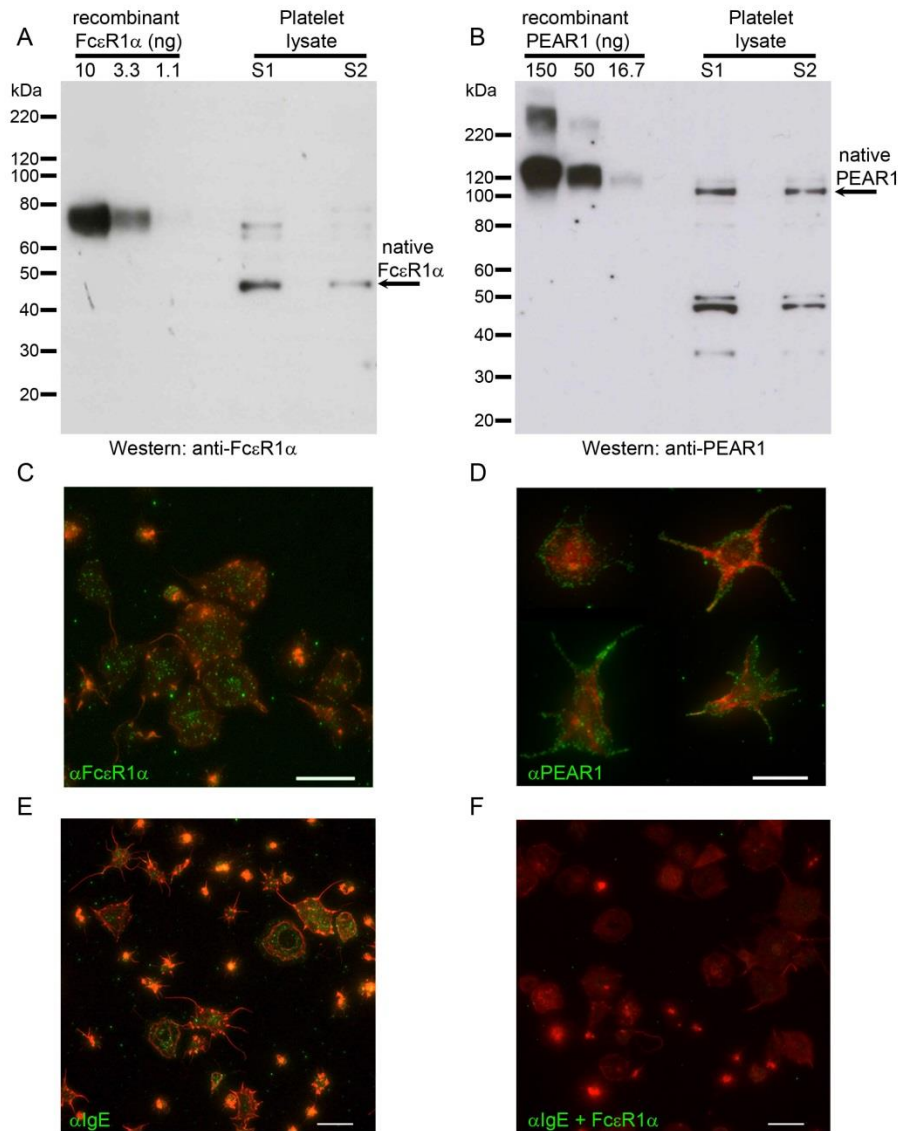

**Supplemental Figure S5. FcεR1α and PEAR1 are both expressed by human platelets.** (A, B) Western blot analysis showing gels loaded with the indicated amount of recombinant monomeric FcεR1α (A) and PEAR1 (B) and platelet lysate samples from two individuals (S1 and S2, at  $1.95 \times 10^7$  platelet equivalents per lane) probed with antibodies raised against the extracellular regions of human FcεR1α and PEAR1. Surface expression of both PEAR1 and FcεR1α was confirmed by immunofluorescence antibody staining on platelets (data not shown). Note that the molecular mass difference between the recombinant FcεR1α and PEAR1 proteins versus the native proteins is due to the tags present in the recombinant proteins. Blots shown are representative of three independent experiments. (C-F) Staining of platelets spread over a fibrinogen matrix and stained with either anti-FcεR1α (C) or anti-PEAR1 (D) in green and counter-stained with phalloidin (red). (E-F) Platelets were spread over a fibrinogen matrix and stained with anti-IgE (green). The IgE staining pattern was punctate (E) and shown to be both specific and extracellular since it could be abolished by incubating the platelets with an excess of soluble recombinant FcεR1α (F). Unlike PEAR1, cell surface FcεR1α is not increased upon platelet activation and using densitometry and the recombinant protein standards, we estimate that FcεR1α is expressed at ~10-fold lower levels than PEAR1 in platelets. Scale bars represent 5 μm.

Supplemental Table S1

| A list of proteomics-based studies to identify proteins expressed by human platelets |                                                              |                                                            |
|--------------------------------------------------------------------------------------|--------------------------------------------------------------|------------------------------------------------------------|
| Number                                                                               | Descriptions                                                 | Ref.                                                       |
| 1                                                                                    | Mainly cytosolic fraction, tyrosine phosphorylated proteins  | Marcus K. et al., Electrophoresis 21, 2622 (2000)          |
| 2                                                                                    | Thrombin activated platelets, total phosphotyrosine proteome | Maguire P. B. et al., Proteomics 2, 642 (2002)             |
| 3                                                                                    | Total cellular proteins                                      | O'Neill E. E. et al., Proteomics 2, 288 (2002)             |
| 4                                                                                    | Cytosolic and membrane fractions                             | Gevaert K. et al., Nat Biotechnol 21, 566 (2003)           |
| 5                                                                                    | Activated platelet releasates                                | Coppinger J. A. et al., Blood 103, 2096 (2004)             |
| 6                                                                                    | Total cellular proteins                                      | Garcia A. et al., Proteomics 4, 656 (2004)                 |
| 7                                                                                    | Activated platelet, total cellular proteins                  | Garcia A. et al., Blood 103, 2088 (2004)                   |
| 8                                                                                    | Activated platelet, secreted proteins                        | McRedmond J. P. et al., Mol Cell Proteomics 3, 133 (2004)  |
| 9                                                                                    | Cytosolic and membrane fractions, multimeric proteins        | Claeys D. et al., Electrophoresis 26, 1189 (2005)          |
| 10                                                                                   | Total cellular proteins                                      | Martens L. et al., Proteomics 5, 3193 (2005)               |
| 11                                                                                   | Membrane proteins                                            | Moebius J. et al., Mol Cell Proteomics 4, 1754 (2005)      |
| 12                                                                                   | Activated platelets, tyrosine phosphorylated proteins        | Garcia A. et al., Proteomics 6, 5332 (2006)                |
| 13                                                                                   | Enriched with low-abundance proteins                         | Guerrier L. et al., J Proteome Res 6, 4290 (2007)          |
| 14                                                                                   | Dense granule proteins                                       | Hernandez-Ruiz L. et al., J Proteome Res 6, 4449 (2007)    |
| 15                                                                                   | Plasma membrane proteins                                     | Lewandrowski U. et al., Mol Cell Proteomics 6, 1933 (2007) |
| 16                                                                                   | α-granule proteins                                           | Maynard D. M. et al., J Thromb Haemost 5, 1945 (2007)      |
| 17                                                                                   | Plasma membrane and intracellular membrane proteins          | Senis Y. A. et al., Mol Cell Proteomics 6, 548 (2007)      |
| 18                                                                                   | Resting platelets, phosphoproteome                           | Zahedi R. P. et al., J Proteome Res 7, 526 (2008)          |

**Supplemental Table S2. The human platelet ectodomain protein library.** Listed for each protein within the library is: the abbreviation of the protein, UniProt accession number, ectodomain truncation residue (Trun.), bait vector used to clone the ectodomain (BLH = Bio-linker-His vector, HLB = His-linker-Bio vector), and bait expression level (mg/ml) where “0” means no detectable protein expression.

| Number                           | Proteins | UniProt | Trun. | Bait Vector | Bait Expression (mg/ml) |
|----------------------------------|----------|---------|-------|-------------|-------------------------|
| <i>Type 1, single ectodomain</i> |          |         |       |             |                         |
| 1                                | ACVR1    | Q04771  | G125  | BLH         | 10                      |
| 2                                | PECAM1   | P16284  | G602  | BLH         | 1.5                     |
| 3                                | SELP     | P16109  | A771  | BLH         | 1.1                     |
| 4                                | C1QBP    | Q07021  | Q282  | BLH         | 0                       |
| 5                                | ACVR1B   | P36896  | P124  | BLH         | 10                      |
| 6                                | ADAM10   | O14672  | W673  | BLH         | 0.687                   |
| 7                                | APLP2    | Q06481  | S693  | BLH         | 3.6                     |
| 8                                | APP      | P05067  | G700  | BLH         | 1.2                     |
| 9                                | BSG      | P35613  | L322  | BLH         | 5                       |
| 10                               | G6B      | O95866  | P141  | BLH         | 1.2                     |
| 11                               | CCDC     | Q8NE86  | T233  | BLH         | 0                       |
| 12                               | CD226    | Q15762  | F252  | BLH         | 2                       |
| 13                               | CD34     | P28906  | T290  | BLH         | 3.6                     |
| 14                               | CD40     | P25942  | L192  | BLH         | 10                      |
| 15                               | CD84     | Q9UIB8  | T224  | BLH         | 1.2                     |
| 16                               | DAG1     | Q14118  | T753  | BLH         | 2                       |
| 17                               | EFNB1    | P98172  | L240  | BLH         | 3.6                     |
| 18                               | ENDOD    | O94919  | P540  | BLH         | 3.8                     |
| 19                               | EPHB1    | P54762  | P245  | BLH         | 3.5                     |
| 20                               | ESAM     | Q96AP7  | P245  | BLH         | 3.6                     |
| 21                               | F11R     | Q9Y624  | G237  | BLH         | 5                       |
| 22                               | FCGR2a   | P12318  | P215  | BLH         | 4                       |
| 23                               | FURIN    | P09958  | P714  | BLH         | 0.98                    |
| 24                               | GP5      | P40197  | P520  | BLH         | 0.113                   |
| 25                               | GP6      | Q9HCN6  | G268  | BLH         | 0.8                     |
| 26                               | GP9      | P14770  | P146  | BLH         | 0                       |
| 27                               | ICAM2    | P13598  | M224  | BLH         | 1                       |
| 28                               | ICAM5    | Q9UMF0  | P834  | BLH         | 0.245                   |
| 29                               | IL6ST    | P40189  | E619  | BLH         | 1.2                     |
| 30                               | JAM3     | Q9BX67  | G243  | BLH         | 10                      |
| 31                               | KIAA     | Q14165  | S270  | BLH         | 1.2                     |
| 32                               | LAMP1    | P11279  | P385  | BLH         | 5                       |



| Number                           | Proteins | UniProt | Trun. | Bait Vector | Bait Expression (mg/ml) |
|----------------------------------|----------|---------|-------|-------------|-------------------------|
| <i>Type 1, single ectodomain</i> |          |         |       |             |                         |
| 33                               | LRRC     | Q14392  | N627  | BLH         | 0                       |
| 34                               | NPHS     | O60500  | P1064 | BLH         | 0                       |
| 35                               | NRXN     | Q9ULB1  | T1401 | BLH         | 2.4                     |
| 36                               | PCDH     | Q9Y5H9  | N697  | BLH         | 0                       |
| 37                               | PTPRC    | P08575  | L577  | BLH         | 1.7                     |
| 38                               | PTPRJ    | Q12913  | P970  | BLH         | 1.8                     |
| 39                               | PTTG     | P53801  | E96   | BLH         | 8.5                     |
| 40                               | PVRL2    | Q92692  | G359  | BLH         | 1                       |
| 41                               | QSOX1    | O00391  | G703  | BLH         | 6.7                     |
| 42                               | SCARF    | Q14162  | T421  | BLH         | 0.81                    |
| 43                               | SEMA4    | Q92854  | S707  | BLH         | 6.3                     |
| 44                               | SIGLE    | Q96PQ1  | T478  | BLH         | 0                       |
| 45                               | SPN      | P16150  | P257  | BLH         | 3.6                     |
| 46                               | STIM1    | Q13586  | D213  | BLH         | 10                      |
| 47                               | TMED1    | Q13445  | R192  | BLH         | 0.69                    |
| 48                               | TMED10   | P49755  | R185  | BLH         | 0.166                   |
| 49                               | TMED2    | Q15363  | R168  | BLH         | 2.2                     |
| 50                               | TMED4    | Q7Z7H5  | R194  | BLH         | 3.6                     |
| 51                               | TMED5    | Q9Y3A6  | R194  | BLH         | 0                       |
| 52                               | TMED9    | Q9BVK6  | R181  | BLH         | 3.6                     |
| 53                               | TREML1   | Q86YW5  | P162  | BLH         | 10                      |
| 54                               | TXNDC    | Q9H3N1  | P137  | BLH         | 0.3                     |
| 55                               | PEAR1    | Q5VY43  | S754  | BLH         | 0.52                    |
| 56                               | LAMP2    | P13473  | P378  | BLH         | 3.6                     |
| 57                               | MPL      | P40238  | S489  | BLH         | 0                       |
| 58                               | BAMBI    | Q13145  | S145  | BLH         | 12                      |
| 59                               | DCBL     | Q96PD2  | P475  | BLH         | 10                      |
| 60                               | FAM      | Q5VUB5  | T300  | BLH         | 4.8                     |
| 61                               | CYYR     | Q96J86  | T61   | BLH         | 5.4                     |
| 62                               | DLK1     | P80370  | A304  | BLH         | 1.5                     |
| 63                               | EGF      | P01133  | K1032 | BLH         | 0                       |
| 64                               | FCER1a   | P12319  | K201  | BLH         | 5                       |

| Number                                  | Proteins     | UniProt              | Trun.          | Bait Vector         | Bait Expression (mg/ml) |
|-----------------------------------------|--------------|----------------------|----------------|---------------------|-------------------------|
| <b><i>Type 1, single ectodomain</i></b> |              |                      |                |                     |                         |
| 65                                      | LRP8         | Q14114               | T824           | BLH                 | 0.142                   |
| 66                                      | INSR         | P06213               | K956           | BLH                 | 0                       |
| 67                                      | LMAN1        | P49257               | T478           | BLH                 | 0.73                    |
| 68                                      | LMAN2        | Q12907               | G320           | BLH                 | 10                      |
| 69                                      | G6f          | Q5SQ64               | K208           | BLH                 | 0                       |
| 70                                      | M6PR         | P20645               | S187           | BLH                 | 1.1                     |
| 71                                      | MET          | P08581               | P927           | BLH                 | 2                       |
| 72                                      | NOTCH3       | Q9UM47               | R1570          | BLH                 | 0                       |
| 73                                      | SORT1        | Q99523               | P758           | BLH                 | 1.6                     |
| 74                                      | CD44         | P16070               | E649           | BLH                 | 0                       |
| 75                                      | GP1BAm       | P07359               | P497           | BLH                 | 2                       |
| 76                                      | GP1BBm       | P13224               | P145           | BLH                 | 3.5                     |
| <b><i>Multi-subunits proteins</i></b>   |              |                      |                |                     |                         |
| 77                                      | GP1Bαβ       | P07359/P13224        | L502/W148      | BLH, α-chain tagged | 1.2                     |
| 78                                      | ITGA5/ITGB1  | P08648/P05556        | P998/P727      | BLH, α-chain tagged | 0.55                    |
| 79                                      | ITGA2/ITGB1  | P17301/P05556        | P1131/P727     | BLH, α-chain tagged | 0.32                    |
| 80                                      | ITGA6/ITGB1  | P23229/P05556        | P1053/P727     | BLH, α-chain tagged | 0                       |
| 81                                      | ITGA2B/ITGB3 | P08514/P05106        | P996/P717      | BLH, α-chain tagged | 0                       |
| 82                                      | ITGAV/ITGB3  | P06756/P05106        | P993/P717      | BLH, α-chain tagged | 0.38                    |
| 83                                      | FBG          | P02671/P02675/P02679 | Q866/Q491/L453 | BLH, α-chain tagged | 0.1                     |
| <b><i>GPI-anchored proteins</i></b>     |              |                      |                |                     |                         |
| 84                                      | CD55         | P08174               | S353           | BLH                 | 1.4                     |
| 85                                      | CD58         | P19256               | R215           | BLH                 | 10                      |
| 86                                      | CD59         | P13987               | G103           | BLH                 | 10                      |
| 87                                      | OTOA         | Q7RTW8               | P1129          | BLH                 | 0                       |
| 88                                      | PRNP         | P04156               | S230           | BLH                 | 3.6                     |
| 89                                      | ULBP3        | Q9BZM4               | P216           | BLH                 | 3.6                     |
| 90                                      | CD109        | Q6YHK3               | S1423          | BLH                 | 0.83                    |

| Number                                                                      | Proteins | UniProt | Trun.     | Bait Vector | Bait Expression<br>(mg/ml) |
|-----------------------------------------------------------------------------|----------|---------|-----------|-------------|----------------------------|
| <b><i>Multi-transmembrane proteins with a long extracellular domain</i></b> |          |         |           |             |                            |
| 91                                                                          | CALCR    | P30988  | Y150      | BLH         | 3.6                        |
| 92                                                                          | CD47     | Q08722  | P139      | BLH         | 3                          |
| 93                                                                          | TM9      | Q92544  | H279      | BLH         | 10                         |
| 94                                                                          | TMEM     | Q9BVC6  | S82       | BLH         | 10                         |
| 95                                                                          | F2R      | P25116  | P106      | BLH         | 10                         |
| 96                                                                          | F2RL3    | Q96RI0  | T77       | BLH         | 15                         |
| 97                                                                          | VIPR1    | P32241  | G145      | BLH         | 1.2                        |
| 98                                                                          | F2RL2    | O00254  | P98       | BLH         | 2.1                        |
| 99                                                                          | ENTP     | P49961  | T38-T478  | BLH         | 0                          |
| 100                                                                         | P2RX1    | P51575  | E52-S337  | BLH         | 0                          |
| 101                                                                         | P2RX6    | O15547  | A60-P336  | BLH         | 0                          |
| 102                                                                         | CD36     | P16671  | G30-N439  | BLH         | 1.2                        |
| <b><i>Type 2 proteins</i></b>                                               |          |         |           |             |                            |
| 103                                                                         | C20      | Q9HDC9  | E62-V416  | HLB         | 1.4                        |
| 104                                                                         | CD69     | Q07108  | P69-K199  | HLB         | 0.8                        |
| 105                                                                         | CLEC1B   | Q9P126  | G52-P229  | HLB         | 0.75                       |
| 106                                                                         | ECE1     | P42892  | G88-W770  | HLB         | 0                          |
| 107                                                                         | LRRC59   | Q96AG4  | C266-Q307 | HLB         | 7.2                        |
| 108                                                                         | LRRC8b   | Q6P9F7  | G327-C803 | HLB         | 0                          |
| 109                                                                         | MTDH     | Q86UE4  | S84-T582  | HLB         | 8.8                        |
| 110                                                                         | PR594    | P42857  | K104-A185 | HLB         | 3                          |
| 111                                                                         | SGCD     | Q92629  | K57-L289  | HLB         | 0.169                      |
| 112                                                                         | SLC3A2   | P08195  | R211-A630 | HLB         | 10                         |
| 113                                                                         | TTMP     | Q5BVD1  | A89-E217  | HLB         | 5.6                        |
| 114                                                                         | FCER2    | P06734  | D48-S321  | HLB         | 8                          |
| 115                                                                         | CD154    | P29965  | H47-L261  | HLB         | 0.03                       |
| 116                                                                         | TFRC     | P02786  | C89-F760  | HLB         | 10                         |

| Number          | Proteins | UniProt | Trun. | Bait Vector | Bait Expression<br>(mg/ml) |
|-----------------|----------|---------|-------|-------------|----------------------------|
| <b>Secreted</b> |          |         |       |             |                            |
| 117             | ANGPT    | Q15389  | F498  | BLH         | 0                          |
| 118             | ARMET    | P55145  | L179  | BLH         | 7                          |
| 119             | C21      | P30042  | K268  | BLH         | 0                          |
| 120             | CCL5     | P13501  | S91   | BLH         | 0.26                       |
| 121             | CTGF     | P29279  | A349  | BLH         | 1.2                        |
| 122             | GGH      | Q92820  | D318  | BLH         | 0.07                       |
| 123             | GSN      | P06396  | A482  | BLH         | 6                          |
| 124             | HINT2    | Q9BX68  | G163  | BLH         | 0                          |
| 125             | HPSE     | Q9Y251  | I543  | BLH         | 0                          |
| 126             | MMP11    | P24347  | L488  | BLH         | 0                          |
| 127             | MMRN1    | Q13201  | T1228 | BLH         | 0.01                       |
| 128             | NID1     | P14543  | K1247 | BLH         | 5.6                        |
| 129             | P4HB     | P07237  | L508  | BLH         | 4.9                        |
| 130             | PCYOX1L  | Q8NBM8  | L494  | BLH         | 0                          |
| 131             | PDIA3    | P30101  | L505  | BLH         | 1.6                        |
| 132             | PDIA4    | P13667  | L645  | BLH         | 6.1                        |
| 133             | PDIA5    | Q14554  | L519  | BLH         | 2.5                        |
| 134             | PF4      | P02776  | S101  | BLH         | 0.01                       |
| 135             | PF4V1    | P10720  | S104  | BLH         | 4.5                        |
| 136             | PLOD2    | O00469  | P737  | BLH         | 0                          |
| 137             | PPBP     | P02775  | D128  | BLH         | 1                          |
| 138             | PIIB     | P23284  | E216  | BLH         | 0.01                       |
| 139             | PRR4     | Q16378  | W134  | BLH         | 0.92                       |
| 140             | PTGS1    | P23219  | L599  | BLH         | 0                          |
| 141             | SCUBE1   | Q8IWY4  | K988  | BLH         | 0                          |
| 142             | SERPINC1 | P01008  | K464  | BLH         | 1.2                        |
| 143             | SERPINE1 | P05121  | P402  | BLH         | 6.4                        |
| 144             | SERPINE2 | P07093  | P398  | BLH         | 0                          |
| 145             | SPARC    | P09486  | I303  | BLH         | 10                         |

| Number          | Proteins | UniProt | Trun. | Bait Vector | Bait Expression<br>(mg/ml) |
|-----------------|----------|---------|-------|-------------|----------------------------|
| <b>Secreted</b> |          |         |       |             |                            |
| 146             | SRGN     | P10124  | L158  | BLH         | 1                          |
| 147             | THBS1    | P07996  | P1170 | BLH         | 0                          |
| 148             | TIMP1    | P01033  | A207  | BLH         | 12                         |
| 149             | TIMP3    | P35625  | P211  | BLH         | 0                          |
| 150             | TPP1     | O14773  | P563  | BLH         | 0.18                       |
| 151             | TTR      | P02766  | E147  | BLH         | 1.2                        |
| 152             | VWF      | P04275  | K2813 | BLH         | 0.003                      |
| 153             | LTBP1    | Q14766  | E1721 | BLH         | 0                          |
| 154             | A2M      | P01023  | A1474 | BLH         | 0                          |
| 155             | AHSG     | P02765  | V367  | BLH         | 10                         |
| 156             | ALB      | P02768  | L609  | BLH         | 10                         |
| 157             | APCS     | P02743  | V223  | BLH         | 0                          |
| 158             | APOH     | P02749  | C345  | BLH         | 1.5                        |
| 159             | C12      | Q9BT56  | W116  | BLH         | 2                          |
| 160             | ECM2     | O94769  | K699  | BLH         | 0                          |
| 161             | F2       | P00734  | E622  | BLH         | 0.33                       |
| 162             | F5       | P12259  | Y2224 | BLH         | 0                          |
| 163             | IGFALS   | P35858  | C605  | BLH         | 0.27                       |
| 164             | ITIH4    | Q14624  | L930  | BLH         | 1.4                        |
| 165             | PLG      | P00747  | N810  | BLH         | 0                          |
| 166             | PLUNC    | Q9NP55  | V256  | BLH         | 0                          |
| 167             | SERPINA  | P01009  | K418  | BLH         | 2.5                        |
| 168             | SMR3B    | P02814  | P79   | BLH         | 1                          |
| 169             | TF       | P02787  | P698  | BLH         | 0.28                       |
| 170             | TGFB1    | P01137  | S390  | BLH         | 0.46                       |
| 171             | VTN      | P04004  | L478  | BLH         | 0.01                       |
| 172             | WNT11    | O96014  | K354  | BLH         | 0                          |
| 173             | PDPN     | Q86YL7  | L131  | BLH         | 4.5                        |
